# Supplementary material for: Atomistic modeling of La3+ doping segregation effect on nanocrystalline yttria-stabilized zirconia
Source: Royal Society of Chemistry journal article supplement (doi:10.1039/c8cp02010h), 2018-01-01
Supplement: c8cp02010h1.pdf [file c8cp02010h1.pdf]

Supporting Information for

**Atomistic modeling of La<sup>3+</sup> doping segregation effect on nanocrystalline yttria-stabilized zirconia**

Shenli Zhang<sup>1</sup>, Haoyan Sha<sup>2</sup>, Ricardo H. R. Castro<sup>1</sup> and Roland Faller<sup>2\*</sup>

<sup>1</sup> Department of Materials Science and Engineering, University of California, Davis, Davis, CA 95616, USA

<sup>2</sup> Department of Chemical Engineering, University of California, Davis, Davis, CA 95616, USA

Table S1 Geometric parameter for each grain boundaries.

| Structure $\Sigma n$ (GB plane)/tilt angle (degree) | Total number of atoms/Zr/O/dopants | Unit cell size lx/ly/lz (Å) |
|-----------------------------------------------------|------------------------------------|-----------------------------|
| [001] tilt axis                                     |                                    |                             |
| $\Sigma 13(510)/22.62$                              | 7192/2024/4720/448                 | 26.08/104.26/30.77          |
| $\Sigma 5(310)/36.9$                                | 5446/1532/3574/340                 | 32.35/64.56/30.75           |
| [110] tilt axis                                     |                                    |                             |
| $\Sigma 11(332)/50.48$                              | 6144/1728/4032/384                 | 24.07/102.73/28.90          |
| $\Sigma 3(111)/70.53$                               | 6703/1886/4399/418                 | 35.44/76.12/28.86           |
| $\Sigma 3(112)/109.47$                              | 6703/1886/4399/418                 | 37.54/71.49/28.90           |
| $\Sigma 11(113)/129.52$                             | 8286/2332/5438/516                 | 33.96/98.73/28.92           |
| $\Sigma 9(114)/141.06$                              | 5120/1440/3360/320                 | 21.69/97.41/28.57           |
| $\Sigma 19(116)/153.47$                             | 7029/1978/4613/438                 | 22.34/126.85/28.96          |

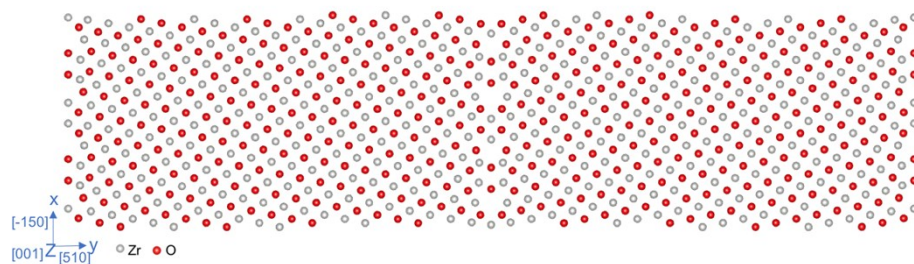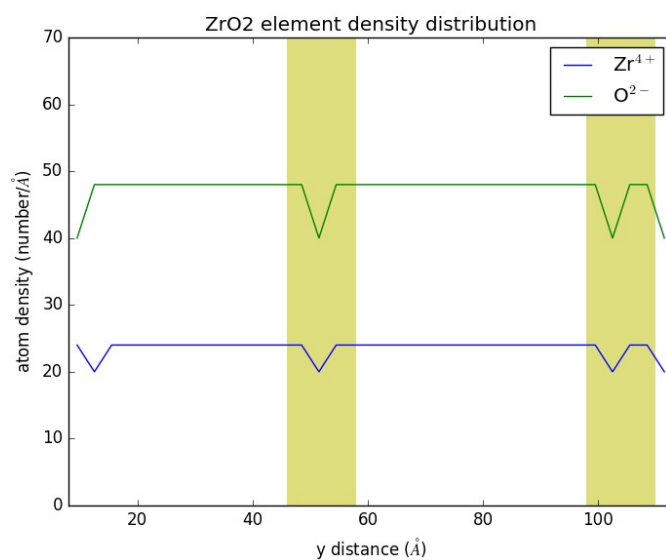

Figure S1 Energy minimized and relaxed  $\text{ZrO}_2$  GB structure and corresponding density distribution. GB regions are marked yellow. The bin size is the same as in Figure 1.

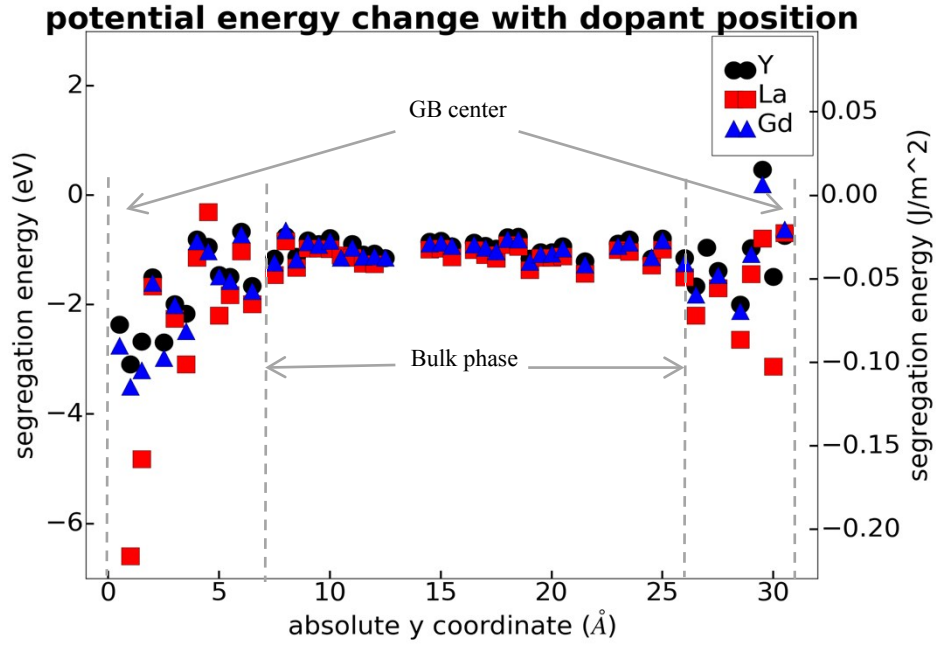

Figure S2 Potential energy change of  $\Sigma 5(310)/[001]$  with dopant position. Two dopants with one oxygen vacancy are introduced to  $\text{ZrO}_2$  phase. Absolute y coordinate is the averaged y value of the 2 dopants during one doping trial, and y is the normal direction to GB plane. Total 118 trials have been made and the bin size for each point is  $0.5 \text{ \AA}$ . Segregation energy in  $\text{J/m}^2$  units was calculated from  $\text{energy}/(2 * \text{GB area})$ , and GB area equals to  $l_x * l_z$ .  $\text{Gd}^{3+}$  is included for comparison.

The segregation energy is defined as:

$$E_{seg}^{\alpha} = (E_{GB}^{\alpha} - E_{bulk}^{\alpha}) - (E_{GB} - E_{bulk})$$

Where  $E_{GB}^{\alpha}$  and  $E_{GB}$  are the total energies of the GB structure with and without dopants,  $E_{bulk}^{\alpha}$  and  $E_{bulk}$  are the total energies of bulk structure with and without the dopants.

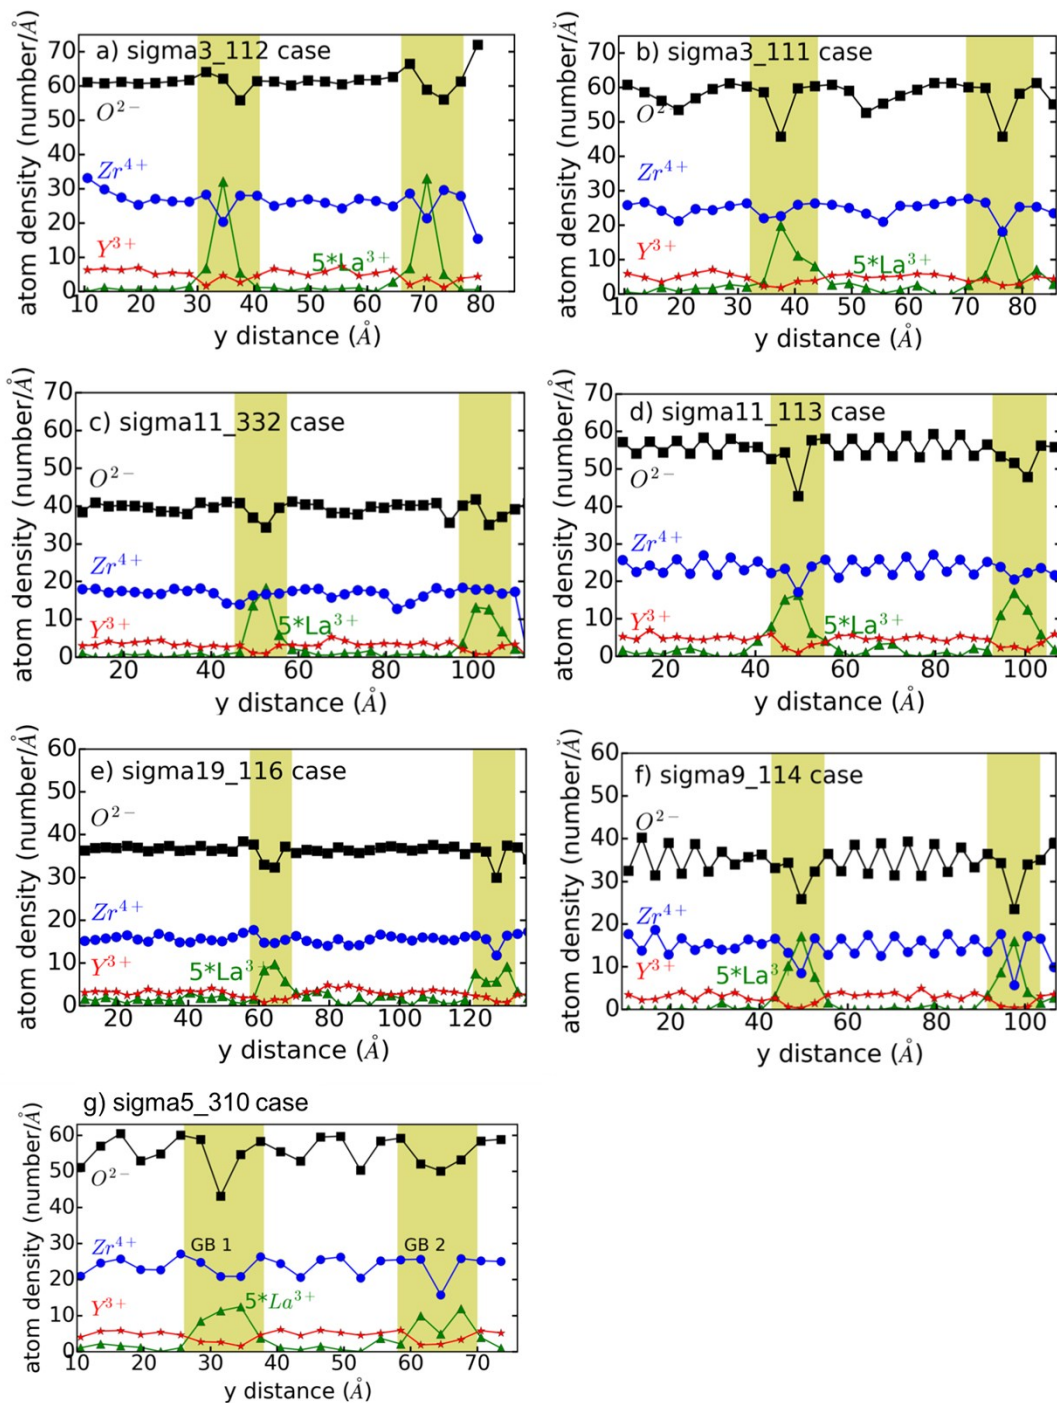

Figure S3 Density profile for different GB structures to show that  $La^{3+}$  segregation occurs in all cases. GB regions are marked yellow. The profile is averaged over 3 independent configurations, each configuration with 40 equilibrated structure snapshots uniformly sampled within  $2 \times 10^7$  MC steps.

Table S2 Average potential energy value for each element corresponding to Figure 3 configurations

| Type of ion      | Potential energy, eV/atom |             |           |
|------------------|---------------------------|-------------|-----------|
|                  | Reference 10YSZ bulk      | 1.5La8.5YSZ | 10YSZ     |
| $\text{Zr}^{4+}$ | -74.66763                 | -74.4989    | -74.45059 |
| $\text{Y}^{3+}$  | -41.42356                 | -41.3912    | -41.32204 |
| $\text{La}^{3+}$ |                           | -38.4308    |           |
| $\text{O}^{2-}$  | -18.00287                 | -18.01102   | -18.047   |

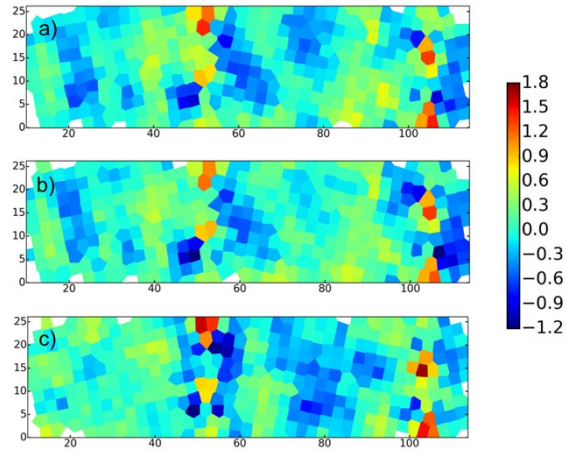

Figure S4 Anion potential energy fluctuation in 8.5Y1.5La a) configuration 1 snapshots 0 to 10 b) configuration 1 snapshots 10 to 20 c) configuration 3 snapshots 0 to 20

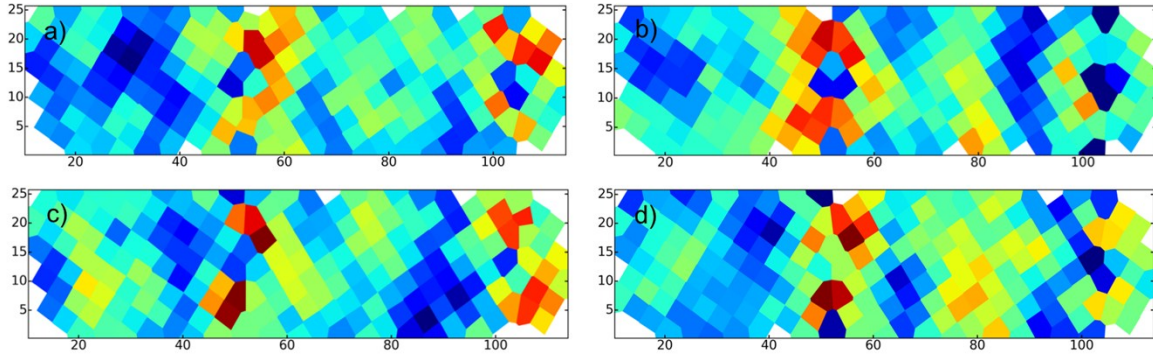

Figure S5 Cations potential energy fluctuation in a) 10YSZ configuration 1; b) 10YSZ configuration 2; c) 8.5Y1.5La configuration 1; d) 8.5Y1.5La configuration 3. The color scale bar is the same as in Figure S2.

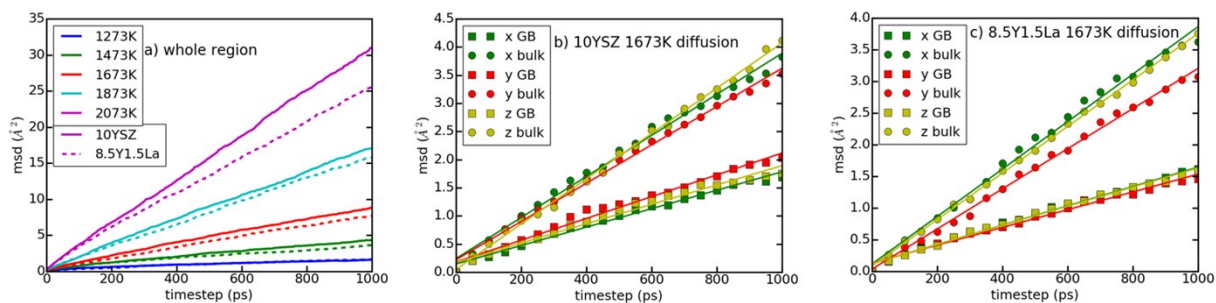

Figure S6 a) Mean square displacement of the whole structure. b) Mean square displacement decomposed to GB and bulk region, and decomposed to x, y, z axis direction: 10YSZ at 1673 K case. c) Mean square displacement decomposed to GB and bulk region, and decomposed to x, y, z axis direction: 8.5Y1.5La at 1673 K case.

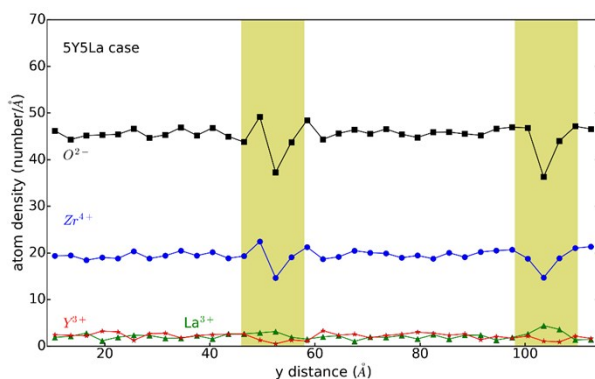

Figure S7 Density profile for 5Y5La doping case at 300 K. GB regions are marked yellow. The profile is averaged over 3 independent configurations, each configuration with 40 equilibrated structure snapshots uniformly sampled within  $2 \times 10^7$  MC steps.

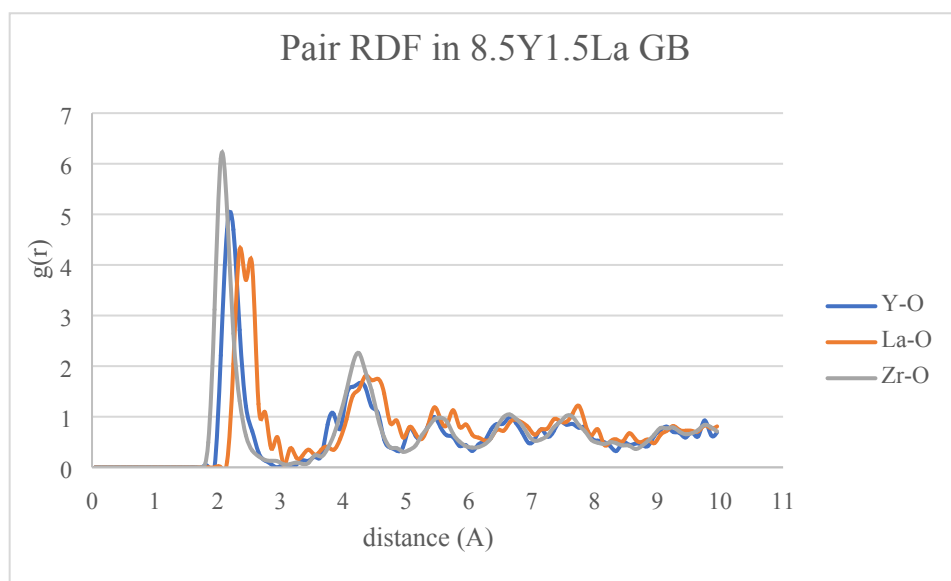

Figure S8 Radial distribution function of Y-O, La-O and Zr-O pairs at GB region. The first peak reflects the bond length of the two elements.

Figure S8 reflects the bond length of different cations with anions at GB region in 8.5Y1.5La configuration ( $\pm 6$  Å from the GB plane), which is the distance of the first peak in RDF. Zr-O has a bond length of 2.05 Å, Y-O 2.25 Å of La-O of 2.35 Å. The RDF curve is not as smooth as in bulk phase due to the limited atom numbers considered in GB region.

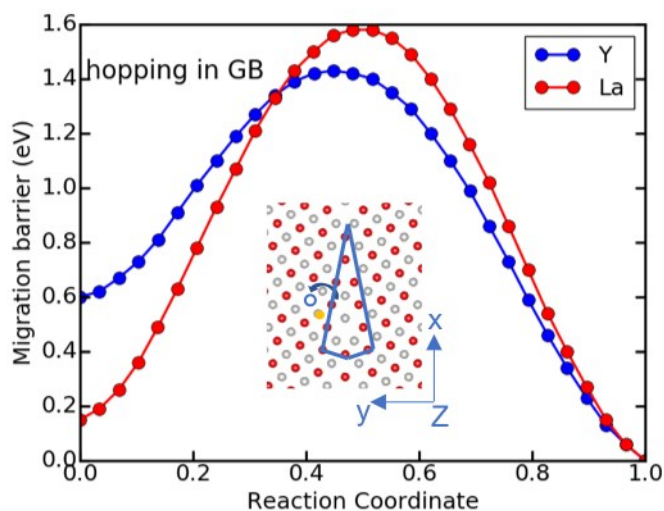

Figure S9 NEB calculation for another hopping energy barrier GB region along y axis. The inset show the oxygen vacancy and dopant positions, where blue lines mark the GB unit cell. Color representation in the insets: void blue circle: oxygen vacancy; yellow: trivalent dopant; red:  $O^{2-}$ ; grey:  $Zr^{4+}$ .
